# Supplementary material for: Determination of acceptance criteria for geometric accuracy of magnetic resonance imaging scanners used in radiotherapy planning
Source: PubMed Central journal article supplement (PMC8058029; doi:10.1016/j.phro.2021.01.003), 2021-01-25
Supplement: mmc1.pdf [file mmc1.pdf]

# Supplementary Material

**Table S1**

Information about the magnetic resonance imaging scanners used in the study.

| Scanner | Model                              | Field strength [Tesla] | Installation year | MRI-only protocol |
|---------|------------------------------------|------------------------|-------------------|-------------------|
| A       | GE Optima MR450w GEM <sub>1</sub>  | 1.5                    | 2011              | yes               |
| B       | GE Signa Artist <sub>1</sub>       | 1.5                    | 2018              | no                |
| C       | Philips Ingenia <sub>2</sub>       | 1.5                    | 2016              | yes               |
| D       | Siemens Magnetom Vida <sub>3</sub> | 3                      | 2017              | no                |
| E       | Siemens Magnetom Vida <sub>3</sub> | 3                      | 2018              | yes               |

<sub>1</sub>GE Healthcare, Chigago, IL, US

<sub>2</sub>Koninklijke Philips N.V., Amsterdam, Netherlands

<sub>3</sub>Siemens Healthcare GmbH, Erlangen, Germany

**Table S2**

The acquisition parameters of the 2D FSE and the 3D GRE sequences used in the study.

| Sequence                         | 2D FSE             | 3D GRE             |
|----------------------------------|--------------------|--------------------|
| Field of view [mm <sup>3</sup> ] | 500×500×320—500    | 500×500×352—500    |
| Acquisition matrix               | 500×500 or 512×512 | 500×500 or 512×512 |
| Slice thickness [mm]             | 2.5                | 1.0—2.0            |
| Number of slices                 | 128—200            | 176—508            |
| Time of repetition [ms]          | 15 000             | 4.2—6.6            |
| Time of echo [ms]                | 93—97              | 1.5—2.8            |
| Echo train length                | 11—15              | 1                  |
| Flip angle [°]                   | 130                | 20                 |
| Water-fat-shift [pixels]         | 0.9—1.8            | 0.6—1.1            |

**Table S3**

The acquisition parameters of the clinical sequences for each scanner of the study.

| Scanner                          | A                  | B                  | C                  | D                  | E                  |
|----------------------------------|--------------------|--------------------|--------------------|--------------------|--------------------|
| Sequence type                    | Dixon <sub>1</sub> | FSE                | Dixon <sub>1</sub> | Dixon <sub>1</sub> | Dixon <sub>1</sub> |
| Field of view [mm <sup>3</sup> ] | 500×500×500        | 500×500×484        | 546×546×300        | 500×520×384        | 500×500×352        |
| Acquisition matrix               | 428×448            | 512×512            | 324×321            | 416×432            | 512×410            |
| Phase encoding direction         | right-left         | anterior-posterior | right-left         | anterior-posterior | anterior-posterior |
| Number of slices                 | 232                | 484                | 120                | 320                | 176                |
| Slice thickness [mm]             | 2.4                | 2                  | 2.5                | 1.2                | 2                  |
| Slice cap [mm]                   | 0                  | -1                 | 0                  | 0                  | 0                  |
| Time of repetition [ms]          | 6.9                | 2502               | 5.7                | 4.3                | 5.6                |
| Time of echo [ms]                | 2.1, 4.3           | 76.9               | 1.6, 3.8           | 1.3, 2.6           | 2.5, 3.7           |
| Echo train length                | 4                  | 88                 | 4                  | 4                  | 4                  |
| Flip angle [°]                   | 15                 | 90                 | 10                 | 10                 | 10                 |
| Water-fat-shift [pixels]         | 0.6                | 1.3                | 0.4                | 0.4                | 0.7                |
| Number of averages               | 2                  | 2                  | 1                  | 2                  | 0.8                |

<sub>1</sub>DIXON is a post-processing method that reconstructs multiple image sets (e.g. water and fat images) [1].

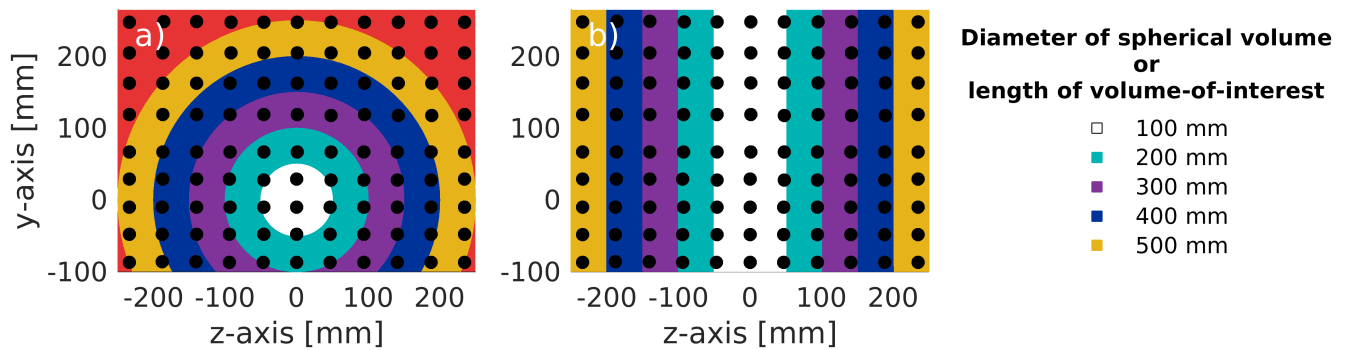

**Figure S1.** The approximate distribution of the signal markers (black dots) in the phantom. The color blocks represent the volumes, in which the distortion distributions were determined versus a) the diameter of spherical volume, and b) the length of cylindrical volume-of-interest along the  $z$ -axis of the scanner.

## References

[1] Dixon W.T. Simple proton spectroscopic imaging. *Radiology* 1984;153(1):189–194.
